# Supplementary material for: Does dispositional self-control moderate the association between stress at work and physical activity after work? A real-life study with police officers
Source: Springer Nature journal article supplement (doi:10.1007/s12662-022-00810-5), 2022-04-29

**Figure 1**

*Scatterplot illustrating the relationship between stress at work (independent variable) and MVPA after work (dependent variable) for the entire sample (n=153)*

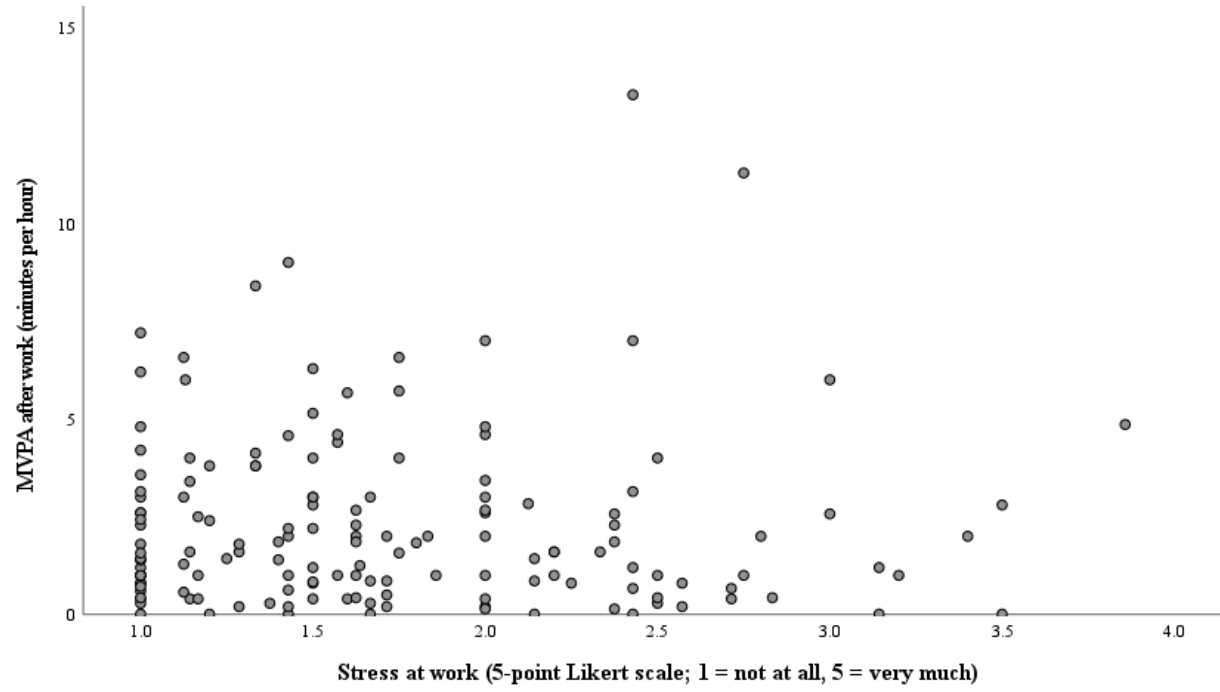

**Figure 2**

Scatterplot illustrating the relationship between stress at work (independent variable) and MVPA after work (dependent variable) for men (103) and women (n=50)

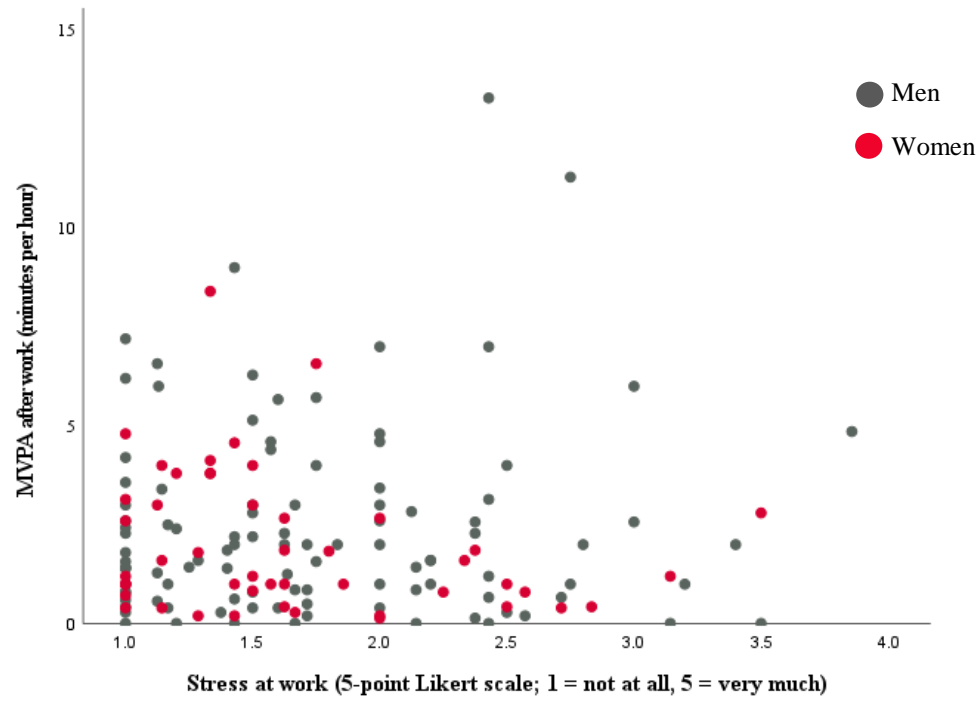

Supplement: MOESM1 [file 20359612]
